# Supplementary material
Source: PubMed Central journal article supplement (PMC5270462)
Supplement: 10.1074_M116.756288_jbc.M116.756288-1.pdf [file 10.1074_M116.756288_jbc.M116.756288-1.pdf]

SUPPORTING INFORMATION

**The Chemical Basis of Thiol Addition to Nitro-Conjugated Linoleic Acid, a Protective Cell-Signaling Lipid\***

Lucía Turell<sup>‡§1</sup>, Darío A. Vitturi<sup>†1</sup>, E. Laura Coitiño<sup>¶</sup>, Lourdes Lebrato<sup>‡§</sup>, Matías N. Möller<sup>¶§</sup>, Camila Sagasti<sup>¶</sup>, Sonia R. Salvatore<sup>†</sup>, Steven R. Woodcock<sup>†</sup>, Beatriz Alvarez<sup>‡§2</sup>, Francisco J. Schopfer<sup>†3</sup>

Laboratorios de <sup>‡</sup>Enzimología, <sup>¶</sup>Química Teórica y Computacional, and <sup>¶</sup>Fisicoquímica Biológica, Instituto de Química Biológica, Facultad de Ciencias, and <sup>§</sup>Center for Free Radical and Biomedical Research, Universidad de la República, Uruguay; <sup>†</sup>Department of Pharmacology and Chemical Biology, University of Pittsburgh, School of Medicine, USA.

**Table of contents**

**FIGURE S1.** LC-MS/MS analysis of the reaction between 12-NO<sub>2</sub>-CLA and BME.

**FIGURE S2.** LC-MS/MS analysis of the reaction between NO<sub>2</sub>-CLA and cysteine.

**TABLE S1.** Structural data.

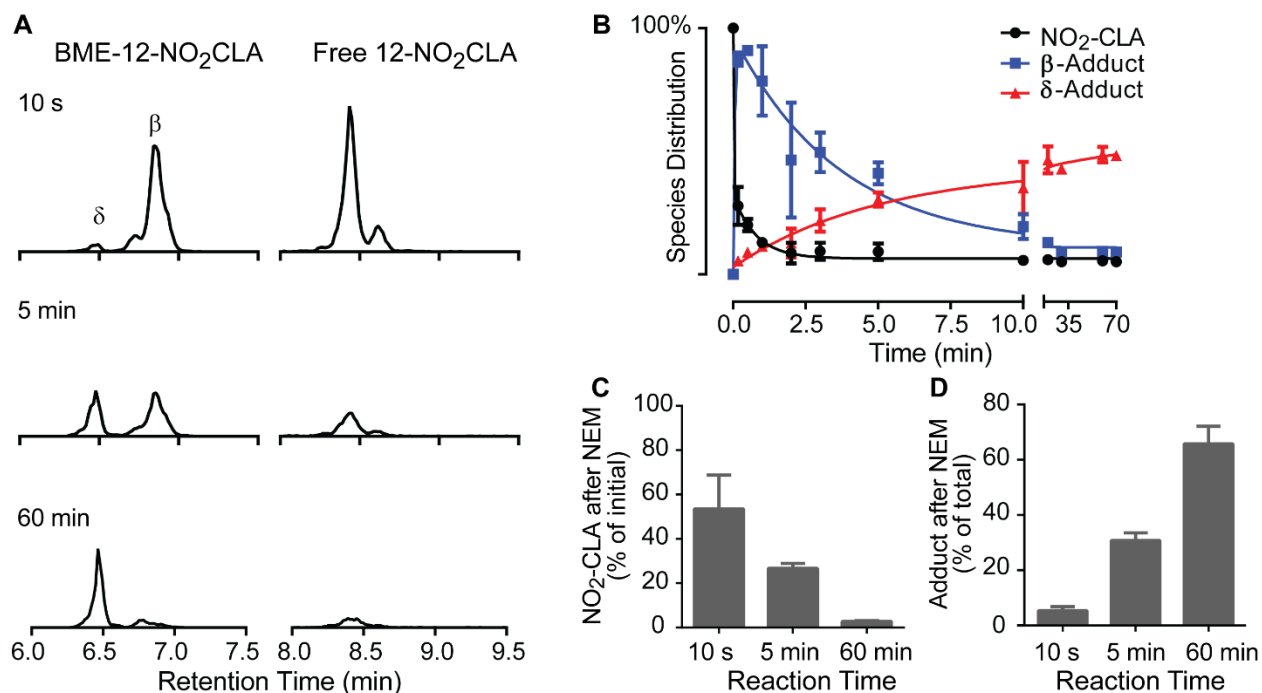

**FIGURE S1.** LC-MS/MS analysis of the reaction between 12-NO<sub>2</sub>-CLA and BME. (A) 12-NO<sub>2</sub>-CLA (10 μM) was reacted with BME (1.76 mM) and aliquots obtained at 10 s (top), 5 min (middle) and 60 min (bottom) for analysis of free 12-NO<sub>2</sub>-CLA (right) and BME-NO<sub>2</sub>-CLA adducts (left). (B) Representative time-course for 12-NO<sub>2</sub>-CLA reaction with BME. (C-D) Aliquots collected at the indicated times were incubated with NEM (100 mM); the percentage of free NO<sub>2</sub>-CLA with respect to that at time zero (C) and the percentage of BME-NO<sub>2</sub>-CLA adduct with respect to NEM-untreated controls (D) were determined. Data are representative from 3 independent experiments.

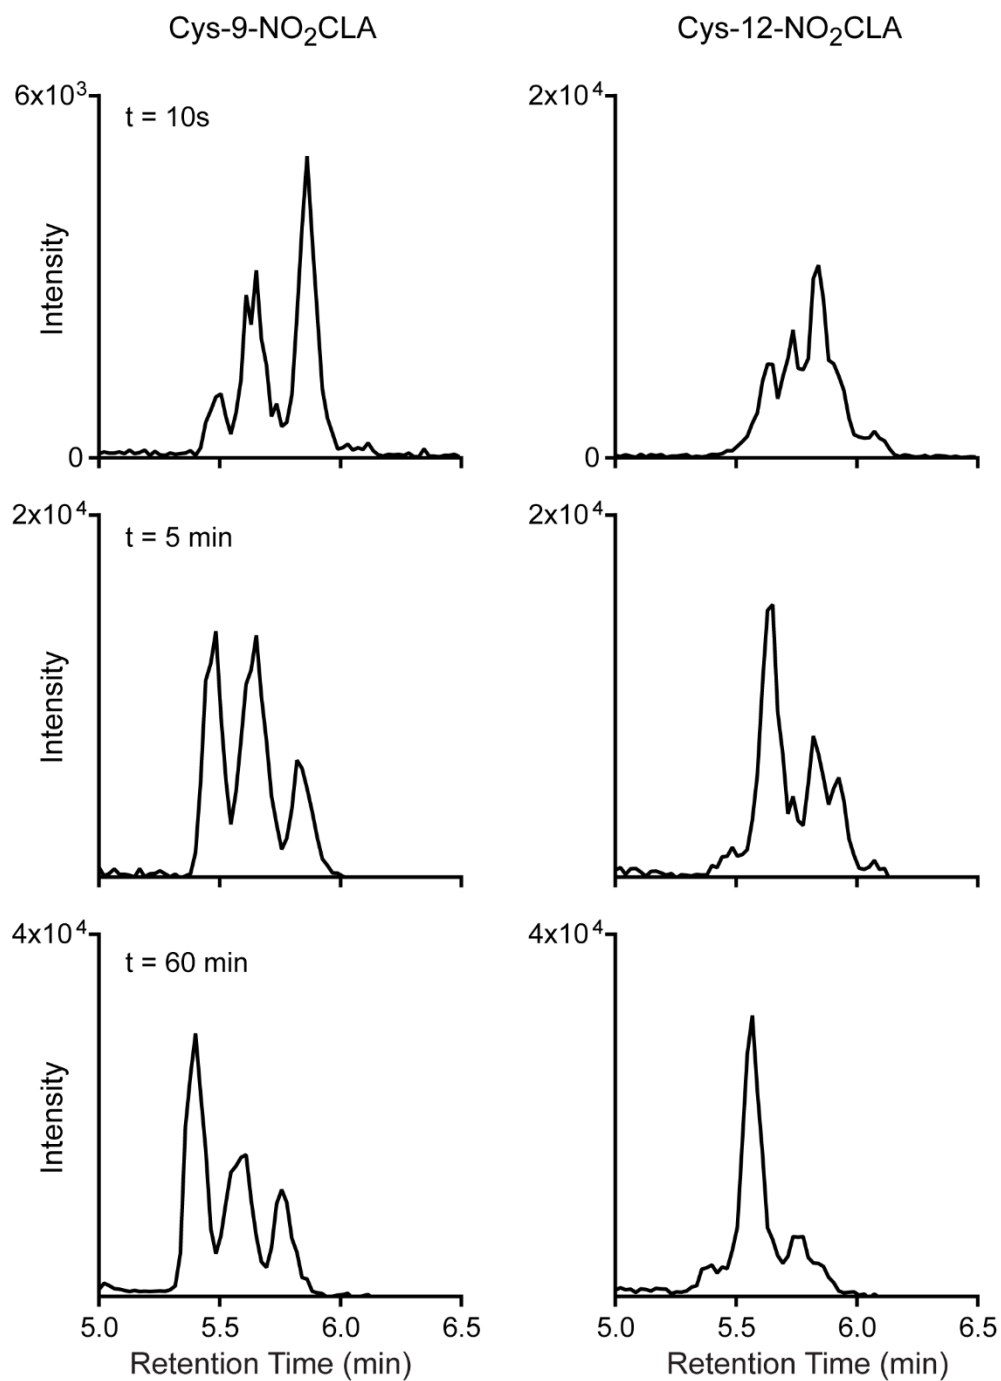

**FIGURE S2.** LC-MS/MS analysis of the reaction between NO<sub>2</sub>-CLA and cysteine. 9- or 12-NO<sub>2</sub>-CLA (10 μM) was reacted with cysteine (500 μM) and aliquots obtained at 10 s (top), 5 min (middle) and 60 min (bottom) for Cys-NO<sub>2</sub>-CLA adduct analysis.

**TABLE S1.** Structural data. Calculated structural data (in Å) and energies (in Hartrees) for all the species taking part in the thiolate  $\beta$ -/ $\delta$ -adduction by a conjugated nitroalkene model compound and further protonation. Data corresponds to structures in aqueous solution fully optimized at the PCM(IEF,water)- $\omega$ B97X-D/6-31+G(d,p) level of theory, using an ultrafine pruned (99.590) grid for numerical calculations.

**RC $_{\beta}$  - E $_{el}$  = -877.2285238 au**

|    |    |           |           |           |
|----|----|-----------|-----------|-----------|
| 1  | 6  | 0.000000  | 0.000000  | 0.000000  |
| 2  | 6  | 0.000000  | 0.000000  | 1.348484  |
| 3  | 8  | 2.327078  | 0.000000  | 0.029158  |
| 4  | 16 | 1.165473  | -3.688697 | 1.651632  |
| 5  | 6  | 1.082458  | -3.416196 | -0.164808 |
| 6  | 1  | 0.964731  | 0.001235  | 1.845084  |
| 7  | 1  | 2.051081  | -3.107376 | -0.564737 |
| 8  | 1  | 0.782244  | -4.328529 | -0.685424 |
| 9  | 1  | 0.355615  | -2.637116 | -0.409007 |
| 10 | 6  | -1.169357 | 0.001540  | -0.924965 |
| 11 | 1  | -1.162324 | 0.883245  | -1.568253 |
| 12 | 1  | -1.165227 | -0.883282 | -1.564566 |
| 13 | 1  | -2.088546 | 0.003999  | -0.341596 |
| 14 | 7  | 1.295045  | -0.000208 | -0.643460 |
| 15 | 8  | 1.316011  | -0.002119 | -1.875547 |
| 16 | 6  | -1.167725 | 0.020084  | 2.197278  |
| 17 | 1  | -2.155872 | -0.005285 | 1.747513  |
| 18 | 6  | -1.040310 | 0.082649  | 3.534594  |
| 19 | 1  | -0.036716 | 0.108300  | 3.955052  |
| 20 | 6  | -2.168791 | 0.117334  | 4.505053  |
| 21 | 1  | -3.137878 | 0.075253  | 4.005015  |
| 22 | 1  | -2.092136 | -0.721827 | 5.202589  |
| 23 | 1  | -2.121526 | 1.028593  | 5.108568  |

**TS $_{\beta}$  - E $_{el}$  = -877.2209917 au**

|    |    |           |           |           |
|----|----|-----------|-----------|-----------|
| 1  | 6  | -0.030175 | -0.001457 | -0.023696 |
| 2  | 6  | -0.039640 | 0.035700  | 1.359718  |
| 3  | 8  | 2.268643  | 0.140072  | 0.017484  |
| 4  | 16 | 0.410435  | -2.467576 | 2.041122  |
| 5  | 6  | 0.866557  | -3.070086 | 0.385925  |
| 6  | 1  | 0.896266  | 0.275385  | 1.846151  |
| 7  | 1  | 1.945280  | -3.205722 | 0.284551  |
| 8  | 1  | 0.371594  | -4.016133 | 0.156892  |
| 9  | 1  | 0.546150  | -2.339699 | -0.366413 |
| 10 | 6  | -1.214356 | -0.183850 | -0.918534 |
| 11 | 1  | -1.290286 | 0.621978  | -1.652084 |
| 12 | 1  | -1.150211 | -1.126242 | -1.469916 |
| 13 | 1  | -2.129589 | -0.197438 | -0.329716 |
| 14 | 7  | 1.209304  | 0.064971  | -0.648966 |
| 15 | 8  | 1.252318  | 0.055278  | -1.902879 |
| 16 | 6  | -1.248035 | 0.235142  | 2.145733  |
| 17 | 1  | -2.205902 | -0.008720 | 1.695157  |
| 18 | 6  | -1.213101 | 0.734351  | 3.389976  |
| 19 | 1  | -0.246981 | 0.966218  | 3.835012  |
| 20 | 6  | -2.418866 | 0.997003  | 4.230260  |
| 21 | 1  | -3.339867 | 0.753175  | 3.697020  |
| 22 | 1  | -2.380730 | 0.403258  | 5.148658  |
| 23 | 1  | -2.456638 | 2.046137  | 4.537768  |

**Anionic I $_{\beta}$  - E $_{el}$  = -877.2460934 au**

|   |    |           |           |           |
|---|----|-----------|-----------|-----------|
| 1 | 6  | -0.073638 | -0.004986 | -0.032449 |
| 2 | 6  | -0.045932 | 0.010292  | 1.463341  |
| 3 | 8  | 2.222444  | 0.061392  | -0.108344 |
| 4 | 16 | -0.656023 | -1.600847 | 2.164271  |

|    |   |           |           |           |
|----|---|-----------|-----------|-----------|
| 5  | 6 | 0.354220  | -2.771642 | 1.221522  |
| 6  | 1 | 0.985346  | 0.124483  | 1.791499  |
| 7  | 1 | 1.412560  | -2.639001 | 1.446942  |
| 8  | 1 | 0.043425  | -3.775469 | 1.510783  |
| 9  | 1 | 0.188238  | -2.637338 | 0.151533  |
| 10 | 6 | -1.353020 | -0.116920 | -0.795023 |
| 11 | 1 | -1.464764 | 0.693253  | -1.520791 |
| 12 | 1 | -1.401345 | -1.058414 | -1.352984 |
| 13 | 1 | -2.201684 | -0.086651 | -0.110276 |
| 14 | 7 | 1.060306  | 0.005289  | -0.696624 |
| 15 | 8 | 1.058098  | -0.035436 | -1.997617 |
| 16 | 6 | -0.892873 | 1.099480  | 2.059334  |
| 17 | 1 | -1.922485 | 1.169313  | 1.711986  |
| 18 | 6 | -0.441161 | 1.957206  | 2.977484  |
| 19 | 1 | 0.590760  | 1.865074  | 3.313984  |
| 20 | 6 | -1.245626 | 3.058945  | 3.594936  |
| 21 | 1 | -1.297164 | 2.939267  | 4.681065  |
| 22 | 1 | -0.779192 | 4.029890  | 3.403499  |
| 23 | 1 | -2.263903 | 3.080233  | 3.200845  |

**Neutral O-Protonated I<sub>β</sub> (aci-Nitro form) - E<sub>el</sub> = -877.7069732 au**

|    |    |           |           |           |
|----|----|-----------|-----------|-----------|
| 1  | 6  | -0.017085 | -0.015473 | -0.007226 |
| 2  | 6  | 0.008716  | 0.047546  | 1.492478  |
| 3  | 8  | 2.280875  | 0.120542  | 0.000654  |
| 4  | 16 | -0.634005 | -1.530412 | 2.201197  |
| 5  | 6  | 0.455567  | -2.721184 | 1.379586  |
| 6  | 1  | 1.032123  | 0.164599  | 1.842693  |
| 7  | 1  | 1.500209  | -2.502534 | 1.602286  |
| 8  | 1  | 0.202414  | -3.704995 | 1.774030  |
| 9  | 1  | 0.295399  | -2.714772 | 0.300784  |
| 10 | 6  | -1.281402 | -0.157693 | -0.783743 |
| 11 | 1  | -1.373682 | 0.640731  | -1.523560 |
| 12 | 1  | -1.290391 | -1.109754 | -1.321699 |
| 13 | 1  | -2.138283 | -0.127999 | -0.113013 |
| 14 | 7  | 1.082694  | 0.009071  | -0.690838 |
| 15 | 8  | 1.201777  | -0.050413 | -1.954614 |
| 16 | 6  | -0.833211 | 1.175862  | 2.022766  |
| 17 | 1  | -1.855237 | 1.246747  | 1.656345  |
| 18 | 6  | -0.377707 | 2.048633  | 2.923795  |
| 19 | 1  | 0.647829  | 1.946001  | 3.275527  |
| 20 | 1  | 2.930494  | 0.1111079 | -0.720314 |
| 21 | 6  | -1.170895 | 3.175614  | 3.506537  |
| 22 | 1  | -1.235235 | 3.076615  | 4.593878  |
| 23 | 1  | -0.684149 | 4.133322  | 3.301289  |
| 24 | 1  | -2.183873 | 3.206316  | 3.100630  |

**Neutral C<sub>α</sub>-Protonated I<sub>β</sub> (unsaturated Nitroalkane form) - E<sub>el</sub> = -877.7202186 au**

|    |    |           |           |           |
|----|----|-----------|-----------|-----------|
| 1  | 6  | -0.007805 | 0.072095  | 0.021788  |
| 2  | 8  | 0.075726  | 0.244197  | 2.978449  |
| 3  | 16 | 1.750066  | 0.008412  | -0.504966 |
| 4  | 6  | 2.520571  | -0.851976 | 0.894961  |
| 5  | 1  | -0.204315 | -0.845317 | 0.582258  |
| 6  | 1  | 1.968456  | -1.761435 | 1.133040  |
| 7  | 1  | 3.526958  | -1.119028 | 0.573722  |
| 8  | 1  | 2.590868  | -0.212638 | 1.773729  |
| 9  | 6  | -0.142509 | 2.640694  | 0.312666  |
| 10 | 1  | -0.320520 | 3.427178  | 1.045158  |
| 11 | 1  | 0.866505  | 2.740255  | -0.087481 |
| 12 | 1  | -0.858568 | 2.759382  | -0.500772 |
| 13 | 7  | 0.427605  | 1.130693  | 2.212269  |
| 14 | 8  | 1.383517  | 1.861402  | 2.417978  |
| 15 | 6  | -0.882772 | 0.098383  | -1.200585 |
| 16 | 1  | -0.742621 | 0.925846  | -1.893220 |
| 17 | 6  | -1.803187 | -0.832907 | -1.453958 |
| 18 | 1  | -1.925197 | -1.650192 | -0.744884 |
| 19 | 6  | -0.355665 | 1.276935  | 0.929843  |
| 20 | 1  | -1.387736 | 1.145238  | 1.255690  |
| 21 | 6  | -2.705790 | -0.839508 | -2.647954 |
| 22 | 1  | -2.509226 | 0.010807  | -3.303852 |
| 23 | 1  | -2.577200 | -1.760868 | -3.223290 |
| 24 | 1  | -3.753314 | -0.804636 | -2.335810 |

**RC<sub>δ</sub> - E<sub>cl</sub> = -877.2281082 au**

|    |    |           |           |           |
|----|----|-----------|-----------|-----------|
| 1  | 6  | 0.055903  | 0.102084  | 0.027721  |
| 2  | 6  | 0.025665  | 0.116385  | 1.471004  |
| 3  | 6  | 1.161923  | 0.110287  | 2.190985  |
| 4  | 16 | 2.144564  | -3.685580 | 1.609583  |
| 5  | 6  | 0.676462  | -3.504974 | 0.517603  |
| 6  | 1  | -0.932020 | 0.135833  | 1.981387  |
| 7  | 1  | 2.113093  | 0.089615  | 1.662758  |
| 8  | 1  | 0.911589  | -3.788680 | -0.510801 |
| 9  | 1  | -0.146836 | -4.135740 | 0.861072  |
| 10 | 1  | 0.320794  | -2.470884 | 0.507717  |
| 11 | 1  | 1.034375  | 0.069148  | -0.440907 |
| 12 | 6  | -1.024573 | 0.129521  | -0.778943 |
| 13 | 7  | -0.768000 | 0.116180  | -2.203303 |
| 14 | 8  | -1.743514 | 0.155852  | -2.954664 |
| 15 | 8  | 0.386532  | 0.066199  | -2.631540 |
| 16 | 6  | -2.465605 | 0.170382  | -0.394987 |
| 17 | 1  | -3.012153 | -0.667912 | -0.830317 |
| 18 | 1  | -2.558594 | 0.114989  | 0.688171  |
| 19 | 1  | -2.942450 | 1.092634  | -0.733010 |
| 20 | 6  | 1.226446  | 0.140033  | 3.679476  |
| 21 | 1  | 0.232251  | 0.148089  | 4.129196  |
| 22 | 1  | 1.779832  | -0.727860 | 4.049693  |
| 23 | 1  | 1.774540  | 1.026550  | 4.012977  |

**TS<sub>δ</sub> - E<sub>cl</sub> = -877.2191037 au**

|    |    |           |           |           |
|----|----|-----------|-----------|-----------|
| 1  | 6  | 0.006212  | -0.025848 | 0.011560  |
| 2  | 6  | 0.000693  | -0.034170 | 1.418136  |
| 3  | 6  | 1.185567  | -0.069602 | 2.121356  |
| 4  | 16 | 1.862511  | -2.639213 | 2.355308  |
| 5  | 6  | 1.145100  | -3.145119 | 0.763694  |
| 6  | 1  | -0.937668 | -0.032202 | 1.964389  |
| 7  | 1  | 2.105174  | 0.014817  | 1.553674  |
| 8  | 1  | 1.914187  | -3.325397 | 0.010014  |
| 9  | 1  | 0.538960  | -4.047730 | 0.862224  |
| 10 | 1  | 0.492858  | -2.342194 | 0.392440  |
| 11 | 1  | 0.979074  | -0.041300 | -0.471193 |
| 12 | 6  | -1.091508 | 0.032049  | -0.821916 |
| 13 | 7  | -0.850781 | 0.063992  | -2.195504 |
| 14 | 8  | -1.833731 | 0.124542  | -2.967214 |
| 15 | 8  | 0.312564  | 0.030063  | -2.658856 |
| 16 | 6  | -2.524750 | 0.056806  | -0.399374 |
| 17 | 1  | -3.085041 | -0.767030 | -0.847485 |
| 18 | 1  | -2.592767 | -0.036410 | 0.683709  |
| 19 | 1  | -3.016387 | 0.988060  | -0.692355 |
| 20 | 6  | 1.267992  | 0.234997  | 3.581549  |
| 21 | 1  | 0.360796  | -0.068252 | 4.106919  |
| 22 | 1  | 2.128667  | -0.245656 | 4.045129  |
| 23 | 1  | 1.383952  | 1.318430  | 3.703803  |

**Anionic I<sub>δ</sub> - E<sub>cl</sub> = -877.2561252 au**

|    |    |           |           |           |
|----|----|-----------|-----------|-----------|
| 1  | 6  | 0.031575  | -0.048783 | 0.005699  |
| 2  | 6  | -0.006345 | 0.036036  | 1.347994  |
| 3  | 6  | 1.216539  | -0.040290 | 2.204255  |
| 4  | 16 | 1.331820  | -1.700402 | 3.010336  |
| 5  | 6  | 1.620451  | -2.723099 | 1.546952  |
| 6  | 1  | -0.950098 | 0.130702  | 1.881348  |
| 7  | 1  | 2.111062  | 0.051604  | 1.581847  |
| 8  | 1  | 2.590432  | -2.493548 | 1.103807  |
| 9  | 1  | 1.602932  | -3.765355 | 1.863463  |
| 10 | 1  | 0.834218  | -2.549490 | 0.809715  |
| 11 | 1  | 0.998981  | -0.140748 | -0.478443 |
| 12 | 6  | -1.108103 | -0.024018 | -0.887907 |
| 13 | 7  | -0.893822 | -0.026352 | -2.195847 |
| 14 | 8  | -1.894536 | -0.007458 | -3.018509 |
| 15 | 8  | 0.299338  | -0.045923 | -2.707389 |
| 16 | 6  | -2.526886 | 0.003061  | -0.415056 |
| 17 | 1  | -3.104194 | -0.816577 | -0.851323 |

|    |   |           |           |           |
|----|---|-----------|-----------|-----------|
| 18 | 1 | -2.569072 | -0.092049 | 0.669841  |
| 19 | 1 | -3.029412 | 0.934570  | -0.693991 |
| 20 | 6 | 1.232392  | 1.019595  | 3.300191  |
| 21 | 1 | 0.360375  | 0.921961  | 3.952360  |
| 22 | 1 | 2.133524  | 0.944961  | 3.912256  |
| 23 | 1 | 1.204924  | 2.014125  | 2.848866  |

**Neutral O-Protonated I<sub>8</sub> (aci-Nitro form) - E<sub>el</sub> = -877.7158051 au**

|    |    |           |           |           |
|----|----|-----------|-----------|-----------|
| 1  | 6  | 0.011816  | 0.011314  | 0.008246  |
| 2  | 6  | 0.004542  | -0.018465 | 1.349084  |
| 3  | 6  | 1.257009  | 0.015215  | 2.163810  |
| 4  | 16 | 1.634983  | -1.680095 | 2.779280  |
| 5  | 6  | 1.945836  | -2.532761 | 1.214729  |
| 6  | 1  | -0.922879 | -0.096910 | 1.910340  |
| 7  | 1  | 2.102140  | 0.319507  | 1.540752  |
| 8  | 1  | 2.803982  | -2.097456 | 0.701340  |
| 9  | 1  | 2.156486  | -3.575635 | 1.451212  |
| 10 | 1  | 1.068113  | -2.477156 | 0.569220  |
| 11 | 1  | 0.963012  | 0.078787  | -0.507358 |
| 12 | 6  | -1.179877 | -0.034131 | -0.824928 |
| 13 | 7  | -1.059531 | -0.011598 | -2.121866 |
| 14 | 8  | -1.994849 | -0.026795 | -2.980396 |
| 15 | 8  | 0.221566  | 0.029393  | -2.650807 |
| 16 | 6  | -2.581074 | -0.081531 | -0.312090 |
| 17 | 1  | -3.121933 | -0.919263 | -0.757093 |
| 18 | 1  | -2.595828 | -0.188898 | 0.769592  |
| 19 | 1  | -3.112551 | 0.835133  | -0.581219 |
| 20 | 6  | 1.135772  | 0.942497  | 3.370226  |
| 21 | 1  | 0.310512  | 0.632061  | 4.016351  |
| 22 | 1  | 2.057353  | 0.944584  | 3.954998  |
| 23 | 1  | 0.938829  | 1.961361  | 3.030444  |
| 24 | 1  | 0.049215  | 0.040715  | -3.605889 |

**Neutral C<sub>6</sub>-Protonated I<sub>8</sub> (unsaturated Nitroalkane form) - E<sub>el</sub> = -877.7243552 au**

|    |    |           |           |           |
|----|----|-----------|-----------|-----------|
| 1  | 6  | 0.003831  | -0.008805 | 0.012334  |
| 2  | 6  | 0.033649  | -0.046921 | 1.344122  |
| 3  | 6  | 1.301164  | 0.015738  | 2.138381  |
| 4  | 16 | 1.670242  | -1.633470 | 2.864647  |
| 5  | 6  | 1.959736  | -2.594248 | 1.359891  |
| 6  | 1  | -0.886584 | -0.129038 | 1.918244  |
| 7  | 1  | 2.137989  | 0.266954  | 1.481269  |
| 8  | 1  | 2.863685  | -2.257149 | 0.851445  |
| 9  | 1  | 2.082448  | -3.634710 | 1.659448  |
| 10 | 1  | 1.106884  | -2.507246 | 0.684905  |
| 11 | 1  | 0.933050  | 0.077625  | -0.544631 |
| 12 | 7  | -1.167011 | -1.081419 | -1.871870 |
| 13 | 8  | -1.778792 | -0.894016 | -2.913830 |
| 14 | 8  | -0.534027 | -2.097497 | -1.632886 |
| 15 | 6  | -2.558422 | -0.191389 | -0.065860 |
| 16 | 1  | -3.395357 | -0.179333 | -0.763638 |
| 17 | 1  | -2.556702 | -1.132195 | 0.486143  |
| 18 | 1  | -2.683102 | 0.629912  | 0.639822  |
| 19 | 6  | 1.215817  | 1.027477  | 3.277576  |
| 20 | 1  | 0.407723  | 0.771838  | 3.968274  |
| 21 | 1  | 2.152614  | 1.066027  | 3.836267  |
| 22 | 1  | 1.013606  | 2.020555  | 2.870969  |
| 23 | 6  | -1.245799 | 0.006608  | -0.812995 |
| 24 | 1  | -1.291381 | 0.919007  | -1.408913 |

**Neutral C<sub>7</sub>-Protonated I<sub>8</sub> (Nitroalkene form) - E<sub>el</sub> = -877.7253594 au**

|   |    |           |           |           |
|---|----|-----------|-----------|-----------|
| 1 | 6  | -0.248169 | -0.017546 | -0.041080 |
| 2 | 6  | -0.070527 | -0.120793 | 2.485243  |
| 3 | 16 | 1.759216  | -0.194898 | 2.568914  |
| 4 | 6  | 2.243093  | 1.237839  | 1.568305  |
| 5 | 1  | -0.337170 | 0.939182  | 2.529877  |
| 6 | 1  | 1.721685  | 2.132443  | 1.911174  |
| 7 | 1  | 3.315365  | 1.373937  | 1.709055  |
| 8 | 1  | 2.040177  | 1.077609  | 0.509611  |
| 9 | 1  | -0.378065 | 1.060080  | -0.039521 |

|    |   |           |           |           |
|----|---|-----------|-----------|-----------|
| 10 | 6 | 0.235518  | -0.581720 | -1.153074 |
| 11 | 7 | 0.557070  | 0.330404  | -2.252770 |
| 12 | 8 | 0.869959  | -0.174421 | -3.327266 |
| 13 | 8 | 0.519653  | 1.545749  | -2.081393 |
| 14 | 6 | 0.490016  | -2.021249 | -1.452941 |
| 15 | 1 | 1.547749  | -2.195822 | -1.659191 |
| 16 | 1 | 0.194964  | -2.628789 | -0.600150 |
| 17 | 1 | -0.079715 | -2.344386 | -2.325193 |
| 18 | 6 | -0.631376 | -0.836792 | 3.710723  |
| 19 | 1 | -0.283710 | -1.872956 | 3.751622  |
| 20 | 1 | -0.334004 | -0.332732 | 4.631491  |
| 21 | 1 | -1.722616 | -0.850009 | 3.658726  |
| 22 | 6 | -0.649869 | -0.734142 | 1.202099  |
| 23 | 1 | -0.401945 | -1.796342 | 1.160495  |
| 24 | 1 | -1.741328 | -0.653621 | 1.284068  |

### Isolated fragments

#### Conjugated nitroalkene model (2-nitro-hexa-2,4-diene) - $E_{el} = -439.0230288$ au

|    |   |           |           |           |
|----|---|-----------|-----------|-----------|
| 1  | 6 | 0.000000  | 0.000000  | 0.000000  |
| 2  | 6 | 0.000000  | 0.000000  | 1.347816  |
| 3  | 8 | 2.328755  | 0.000000  | 0.029273  |
| 4  | 1 | 0.966042  | 0.000354  | 1.842261  |
| 5  | 6 | -1.169111 | 0.000113  | -0.925273 |
| 6  | 1 | -1.163395 | 0.882993  | -1.566935 |
| 7  | 1 | -1.164001 | -0.883055 | -1.566542 |
| 8  | 1 | -2.088361 | 0.000637  | -0.341899 |
| 9  | 7 | 1.296899  | -0.000079 | -0.643704 |
| 10 | 8 | 1.317491  | -0.000092 | -1.875010 |
| 11 | 6 | -1.164365 | 0.001093  | 2.200708  |
| 12 | 1 | -2.154566 | -0.003111 | 1.754758  |
| 13 | 6 | -1.030504 | 0.009149  | 3.539109  |
| 14 | 1 | -0.024991 | 0.013911  | 3.955863  |
| 15 | 6 | -2.153998 | 0.012150  | 4.515663  |
| 16 | 1 | -2.085762 | -0.859298 | 5.173293  |
| 17 | 1 | -2.091846 | 0.893245  | 5.160952  |
| 18 | 1 | -3.125958 | 0.005433  | 4.019419  |

#### Thiolate model (methanethiolate) - $E_{el} = -438.2073199$ au

|   |    |           |           |           |
|---|----|-----------|-----------|-----------|
| 1 | 6  | -0.647053 | 0.505795  | 0.008339  |
| 2 | 1  | -0.297970 | -0.528948 | -0.018505 |
| 3 | 1  | -0.298851 | 1.001349  | -0.900897 |
| 4 | 1  | -1.738948 | 0.491280  | -0.019953 |
| 5 | 16 | -0.033294 | 1.374509  | 1.510728  |
